# Supplementary material
Source: PubMed Central journal article supplement (PMC3800146)

# TB PAD: Fringe Diagram

Lane A - Ethambutol Test ( $\text{CuSO}_4$ )

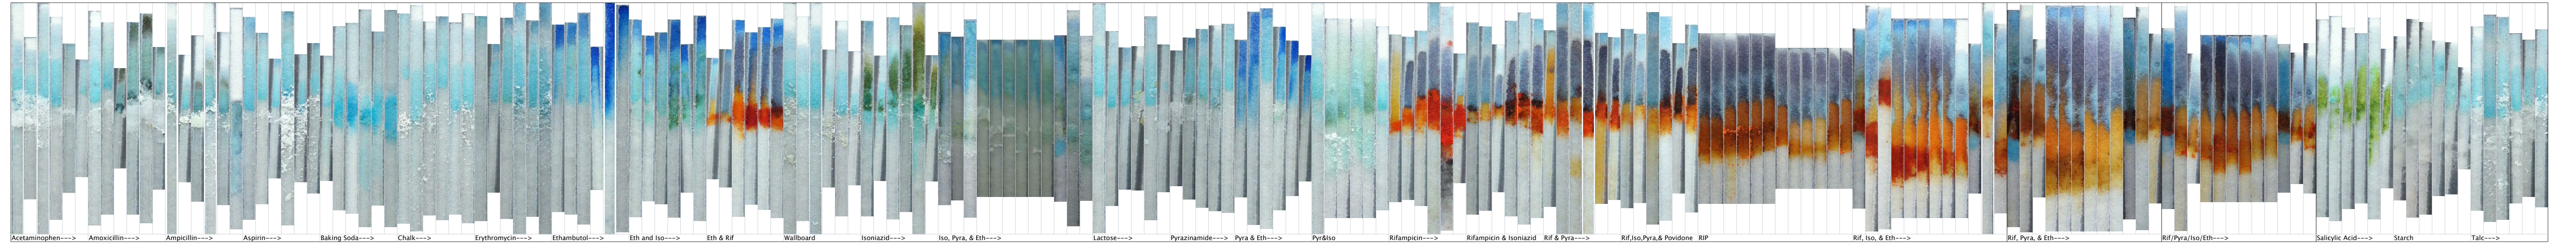

Lane B - B-Lactam Test ( $\text{CuSO}_4$ )

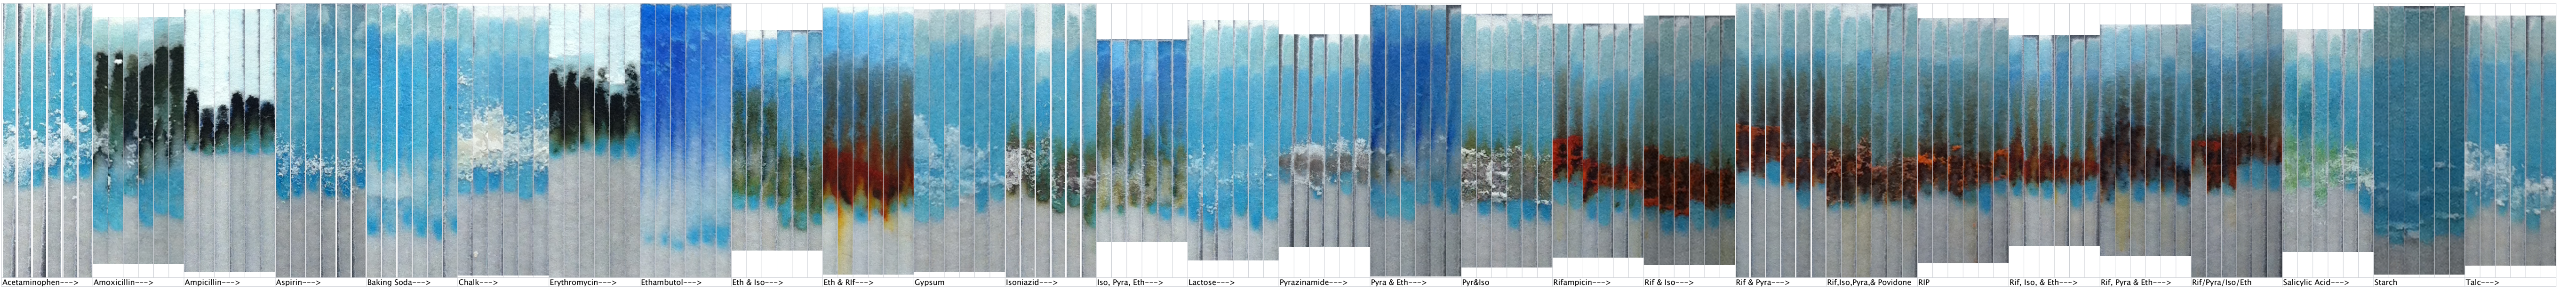

Lane C - Rifampicin Test ( $\text{Fe}(\text{NO}_3)_3$ )

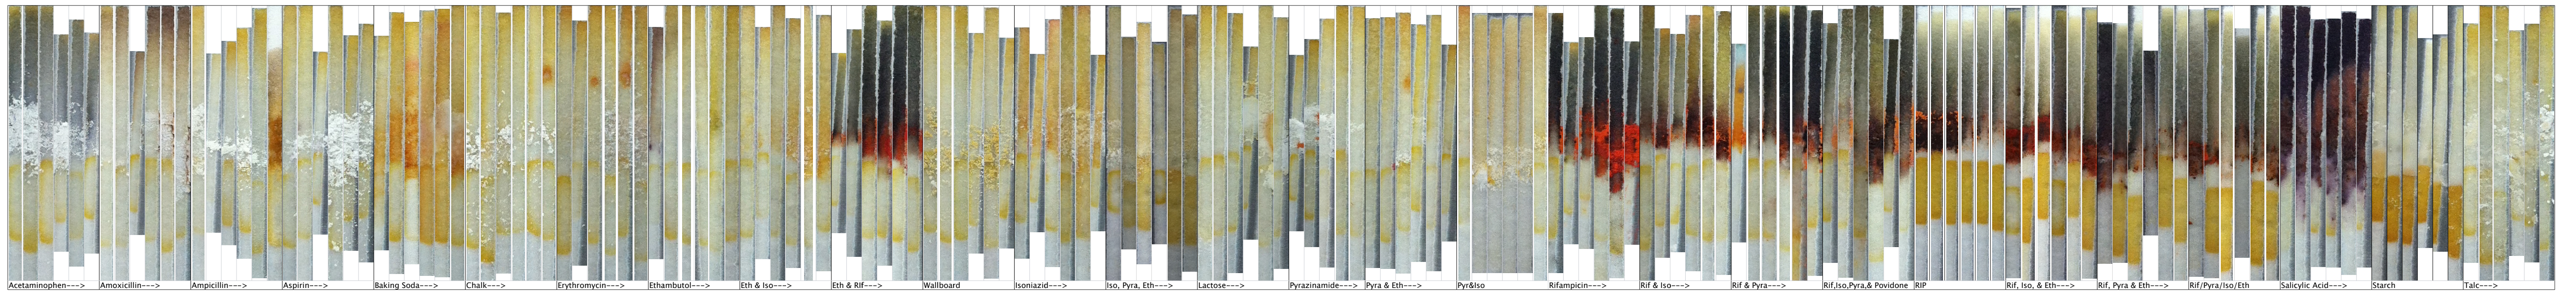

Lane D - Pyrazinamide Test (SNP)

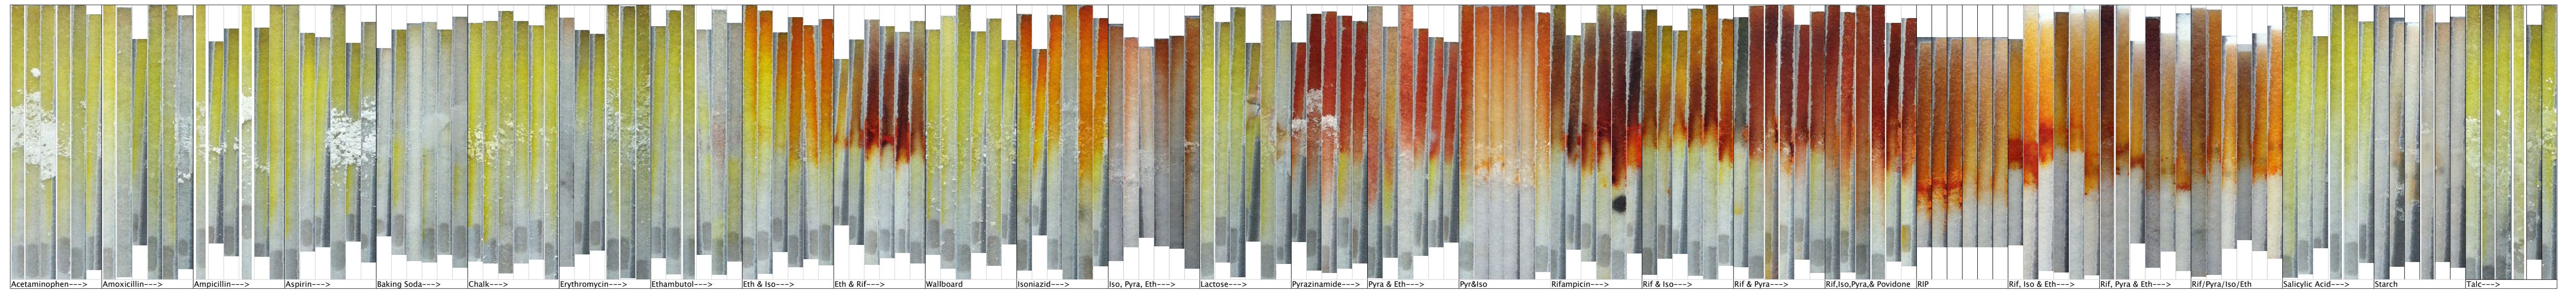

Lane E - Isoniazid Test (NQ)

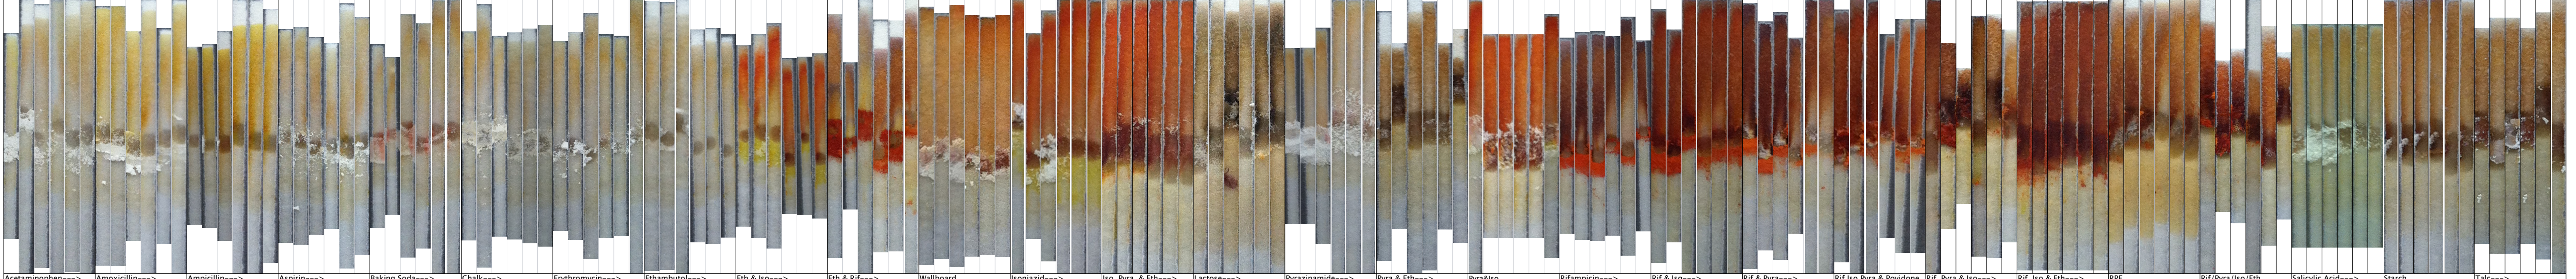

Lane F - Talc Test (Eosin Red)

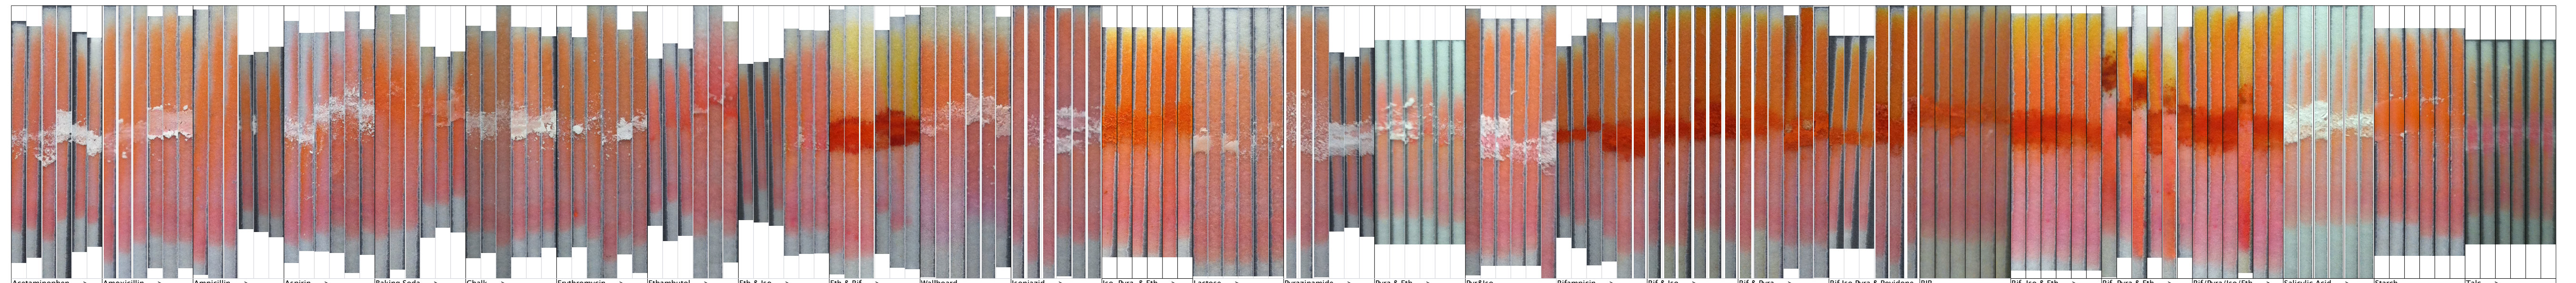

Lane G - Electron Rich Phenol Test (Nitroaniline)

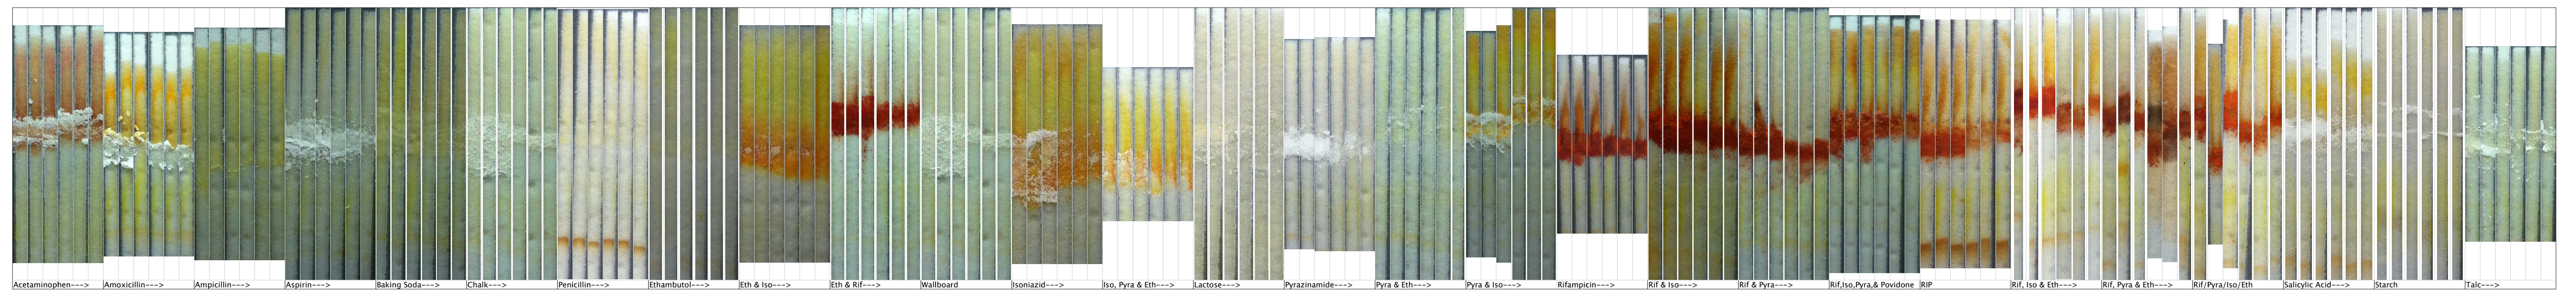

Lane H - Starch Test (Triiodide)

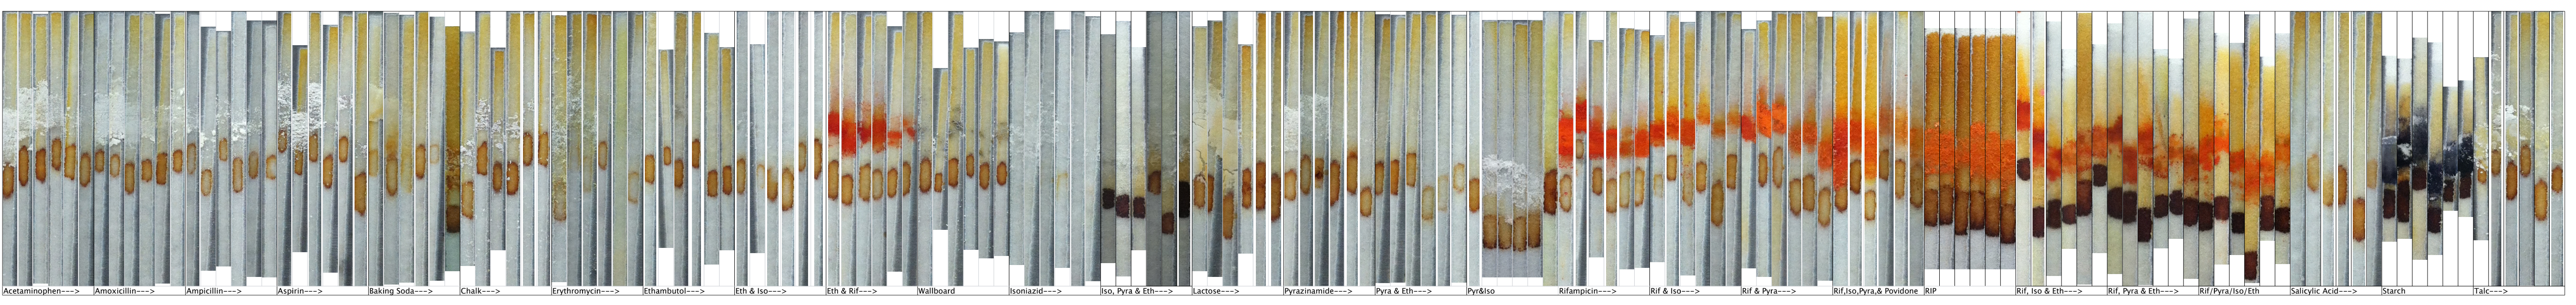

Lane I - Carbonate Test ( $\text{FeCl}_3$ )

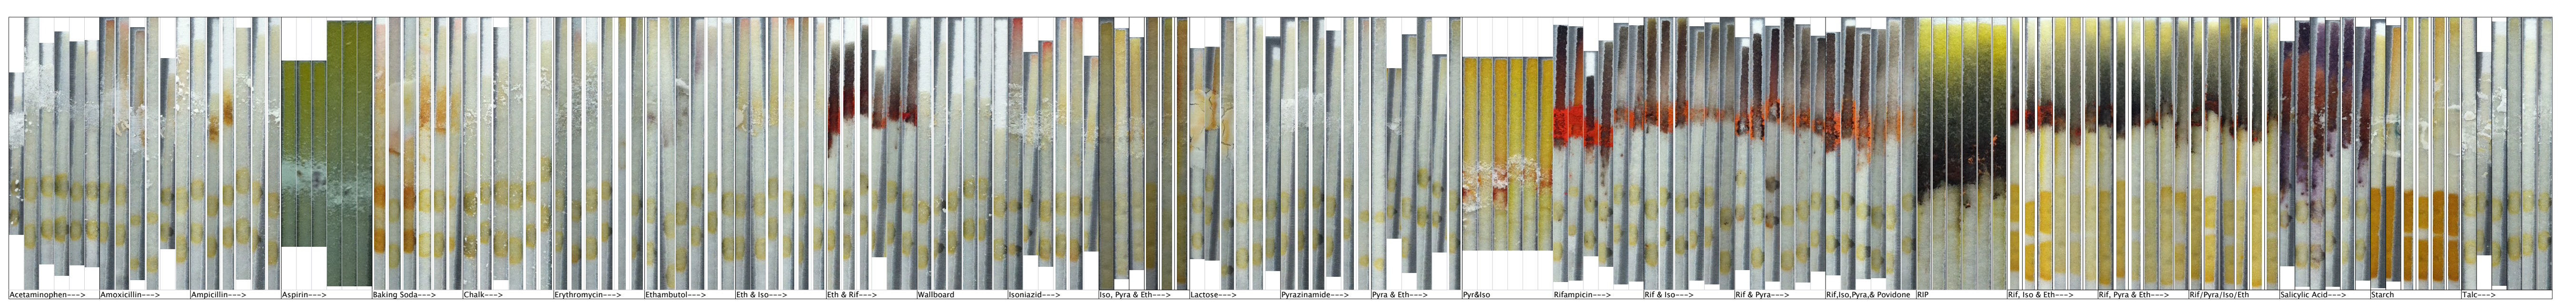

Supplement: NIHMS495851-supplement-1_si_002.pdf [file NIHMS495851-supplement-1_si_002.pdf]
